# Supplementary material
Source: PubMed Central journal article supplement (PMC10559996)
Supplement: NIHMS1933000-supplement-supplement.pdf [file NIHMS1933000-supplement-supplement.pdf]

## Supplementary Appendix

Supplement to: Sperling RA, Donohue MC, Raman R, et al. Trial of solanezumab in preclinical Alzheimer's disease. *N Engl J Med* 2023;389:1096-107. DOI: 10.1056/NEJMoa2305032

This appendix has been provided by the authors to give readers additional information about the work.

## **Supplemental Appendix**

### *Contents:*

Collaborators (pages 2-15)

Supplemental Table 1. Representativeness of study population (page 16)

Supplemental Figure 1. Administered doses of solanezumab or placebo per participant and weeks since randomization (page 17)

Supplemental Figure 2. Subgroup Analyses of Primary Outcome (pages 18-19)

Supplemental Table 2: MMRM Analysis of Primary and Secondary Endpoints (Modified Intention-to-Treat Population) (page 20)

Supplemental Table 3. Imaging Biomarker Endpoints (page 21)

Supplemental Figure 3. Imaging Biomarker Endpoints (pages 22-23)

Supplemental Figure 4. Cognitive and functional scores by level of baseline amyloid (pages 24-25)

Supplemental Table 4. Adverse events (pages 26-29)

## Collaborators

We would like to especially acknowledge the dedication of all the participants and their study partners. We are grateful to the A4 site investigators and staff, and all of the partnership team members who made the A4 Study possible. In particular, the authors wish to acknowledge the contributions of our faculty colleagues: Drs. Joshua Grill, Jason Karlawish, Neil Graff-Radford, Gregory Jicha, Stephen Salloway, Rebecca Amariglio, Katherine Papp, Aaron Schultz, Robert Rissman, and Mr. Gustavo Jimenez-Maggiore. We would like to thank the A4 Data and Safety and Monitoring Board (DSMB), chaired by Dr. Daniel Weintraub, and Dr. Laurie Ryan from the National Institute on Aging. We would also like to highlight the special contributions of individuals from the A4 coordinating center at ATRI: Sara Abdel-Latif, Alison Belsha, Stefania Bruschi, Paula Cohen, Devon Gessert, Karin Ernstrom, Renarda Jones, Oliver Langford, Gabriela Muranevici, Elizabeth Shaffer, Hongmei Qiu, Vedeline Torreon, Sarah Walter, and colleagues from Eli Lilly and Co.: Russell Barton, Cheryl Brown, Phyllis Ferrell, Dr. Eric Siemers, and Isabella Velona.

## A4 Study Team

| First Name | Last Name        |
|------------|------------------|
| Reisa      | Sperling         |
| Paul       | Aisen            |
| Roy        | Yaari            |
| Cheryl     | A Brown          |
| John       | R Sims           |
| Michael    | Donohue          |
| Mike       | Rafii            |
| Rema       | Raman            |
| Robert     | Rissman          |
| Cecily     | Jenkins          |
| Gustavo    | Jimenez-Maggiore |
| Jeremy     | Pizzola          |
| Alison     | Belsha           |
| Clifford   | Jack Jr.         |
| Jason      | Karlawish        |
| Joshua     | Grill            |
| James B.   | Brewer           |
| Mark       | Mintun           |
| Karen      | Holdridge        |
| Isabella   | Velona           |
| Kenneth    | Marek            |

|          |                   |
|----------|-------------------|
| John     | Seibyl            |
| Marybeth | Howlett           |
| Paul     | Maruff            |
| Keith    | Johnson           |
| Reisa    | Sperling          |
| Keith    | Johnson           |
| Aaron    | Schultz           |
| Dorene   | Rentz             |
| Kate     | Papp              |
| Beth     | Mormino           |
| Rebecca  | Amariglio         |
| Gad      | Marshall          |
| Dylan    | Kirn              |
| Michael  | Properzi          |
| J. Alex  | Becker            |
| Rachel   | Buckley           |
| Paul     | Aisen             |
| Maria    | Arampatzidou      |
| Alison   | Belsha            |
| Jennifer | Salazar           |
| Paula    | Cohen             |
| Jorge    | Gutierrez         |
| Harriett | Davey             |
| Melissa  | Ruiz              |
| Isabel   | Francis           |
| Michael  | Rafii             |
| Gabriela | Muranevici        |
| Tiffany  | Chow              |
| Steve    | Bruno III         |
| Gina     | Garcia-Camilo     |
| Adriana  | Bohorquez         |
| Vedeline | Torreon           |
| Marianne | Manire            |
| Renarda  | Jones             |
| Alyssa   | Carroll (Schmitt) |
| Sarah    | Danowski          |
| Deborah  | Tobias            |
| Jeremy   | Pizzola           |
| Lindsey  | Earp              |

|           |                  |
|-----------|------------------|
| Dan       | Abinsay          |
| Sarah     | Walter           |
| Ryoko     | Ihara            |
| Cecily    | Jenkins          |
| Xavier    | Salazar          |
| Stefanie  | Juliano          |
| Sarah     | Espinoza         |
| Shelley   | Moore            |
| Taylor    | Clanton          |
| Agnes     | Lewandowski      |
| Gustavo   | Jimenez-Maggiara |
| Phuoc     | Hong             |
| Hongmei   | Qiu              |
| Jia-shing | So               |
| Stefania  | Bruschi          |
| Kimberlee | Eudy             |
| Quin      | Revel            |
| Michael   | Selsnik          |
| Olusegun  | Adegoke          |
| Veasna    | Tan              |
| Olga      | Baryshnikava     |
| Iris      | Sim Dacio        |
| Sandhya   | Niranjan Jaiswal |
| Elizabeth | Shaffer          |
| Michelle  | Pablo            |
| Rema      | Raman            |
| Michael   | Donohue          |
| Karin     | Ernstrom         |
| Gopalan   | Sethuraman       |
| Jiyoon    | Choi             |
| Oliver    | Langford         |
| Shunran   | Wang             |
| Andy      | Liu              |
| Barbara   | Bartocci         |
| Melissa   | Korba            |
| Robert    | Rissman          |
| Sara      | Abdel-Latif      |
| Howard    | Feldman          |
| Genny     | Matthews         |

|             |               |
|-------------|---------------|
| Stephanie   | Parks         |
| Jen         | Mason         |
| Jason       | Young         |
| Ashlee      | Heldreth      |
| Renarda     | Jones         |
| Janet       | Kastelan      |
| Rebecca     | Ryan-Jones    |
| Lindsay     | Cotton        |
| Maria       | Bulger Lennox |
| Ronelyn     | Chavez        |
| Tilman      | Oltersdorf    |
| Curtis      | Taylor        |
| Barbara     | LaPlante      |
| Meghan      | Stirn         |
| Joanne      | Brechlin      |
| Gina        | Varner        |
| Carol       | Evans         |
| Karim       | Hussein       |
| Erika       | Wilson        |
| Ronald      | Thomas        |
| Shelia      | Jin           |
| James       | Barlow        |
| James B.    | Brewer        |
| Nichol      | Ferng         |
| Robin       | Jennings      |
| Leonardino  | Digma         |
| Keith       | Johnson       |
| Aaron       | Schultz       |
| J. Alex     | Becker        |
| Heidi       | Jacobs        |
| Jorge       | Sepulcre      |
| Michael     | Properzi      |
| Justin      | Sanchez       |
| Matthew     | Scott         |
| Bret J.     | Borowski      |
| Petrice M.  | Cogswell      |
| Clifford R. | Jack, Jr.     |
| Cory A.     | Johnson       |
| Kejal       | Kantarci      |

|             |                |
|-------------|----------------|
| Leonard C.  | Matoush, Jr.   |
| William C.  | Turke          |
| Ashritha L. | Reddy          |
| Denise A.   | Reyes          |
| Kaely B.    | Thostenson     |
| Samantha M. | Zuk            |
| Jason       | Karlawish      |
| Jeffrey M.  | Burns          |
| Joshua D.   | Grill          |
| David       | Sultzer        |
| Kenneth     | Marek          |
| John        | Seibyl         |
| Reneé       | Tschopp        |
| Donna       | Miles          |
| Paul        | Maruff         |
| Amy         | Fredrickson    |
| François    | Windels        |
| Bodil       | Hook           |
| Lenny       | Nuciforo       |
| Natalia     | Contreras      |
| Patrick     | McCabe         |
| Becky       | Watt Knight    |
| Rachel      | Griffith       |
| Melissa     | McGue          |
| Shannon     | Conti          |
| Amy         | Martin Vogt    |
| Andrea      | Abram          |
| Bhavna      | Madduri        |
| Cheryl A.   | Brown          |
| Dillon      | Hilderbrand    |
| Isabella    | Velona         |
| John Brad   | Holmes         |
| John R.     | Sims           |
| Julie       | Chandler       |
| Karen       | Holdridge      |
| Keith       | Parsons        |
| Lisa        | Ferguson-Sells |
| Mark        | Mintun         |
| Marybeth    | Devine         |

|           |              |
|-----------|--------------|
| Marybeth  | Howlett      |
| Michael   | Case         |
| Michele   | Mancini      |
| Michael   | Pontecorvo   |
| Peter     | Fairfield    |
| Phyllis   | Ferrell      |
| Roy       | Yaari        |
| Satina    | Hall         |
| Scott     | Kaiser       |
| Sergey    | Shcherbinin  |
| Stacy     | Huckins      |
| Susan     | Warner       |
| Jude      | Burger       |
| Colin L.  | Masters      |
| Andrew    | Huynh        |
| Paul      | Yates        |
| Georgios  | Zisis        |
| Laura     | Marginson    |
| Sarah     | Best         |
| Rebecca   | Shostak      |
| Kayla     | VanderPloeg  |
| Elsa      | Mann         |
| Julia     | Truemner     |
| Sandra    | Black        |
| Benjamin  | Lam          |
| Chinthaka | Heyn         |
| Samantha  | Paul-Stotz   |
| Maryna    | Butenko      |
| Sharon    | Cohen        |
| C. Ian    | Cohen        |
| Atif      | Shaikh       |
| Ellen     | Buchman      |
| Barathy   | Tharmalingam |
| Linda     | Schlesinger  |
| Robin     | Hsiung       |
| Ellen     | Kim          |
| Tahlee    | Marian       |
| Haakon    | Nygaard      |
| Benita    | Mudge        |



|              |                    |
|--------------|--------------------|
| Michele      | Assaly             |
| Takeshi      | Iwatsubo           |
| Atsushi      | Iwata              |
| Kazushi      | Suzuki             |
| Yoshiki      | Niimi              |
| Ken-ichiro   | Sato               |
| William J.   | Burke              |
| Roma         | Patel              |
| Daniel       | Viramontes Apodaca |
| Sachin Y.    | Pandya             |
| Anna D.      | Burke              |
| Edward       | Zamrini            |
| Zoran        | Obradov            |
| Christine M. | Belden             |
| Carol        | Cline              |
| Margaret     | Rich               |
| Lisa         | Roye               |
| Marwan       | Sabbagh            |
| Sydney       | O'Connor           |
| Valory       | Pavlik             |
| Melissa      | Yu                 |
| Shayla       | Yonce              |
| Angela       | Okolie             |
| Uzma         | Khan               |
| Esteban      | Olivera            |
| Elma         | Fallejo            |
| Jennifer     | West               |
| Olivia       | Reilly             |
| Noureen      | Dhanani            |
| Maria Amy    | Edridge            |
| Alisa        | Petit              |
| Yarnick      | Mirjah             |
| Robert A.    | Stern              |
| Jane         | Mwicigi            |
| Alexa        | Puleio             |
| Jesse        | Mez                |
| Wendy        | Qiu                |
| Eric         | Steinberg          |
| Mark         | Brody              |

|            |                |
|------------|----------------|
| Paayal     | Patel          |
| Cynthia    | Stimeck        |
| Stephen P. | Salloway       |
| Diane      | Monast         |
| Vanessa    | Rua            |
| Sophia     | Tarro          |
| Jessica    | Alber          |
| Athene     | K.W. Lee       |
| Gad A.     | Marshall       |
| Tia        | Hall           |
| Emily      | Sprague        |
| Mariana    | Palou          |
| Martha     | Vander Vliet   |
| Dorene M.  | Rentz          |
| Michael    | Karathanos     |
| Christy    | Lisenbee       |
| Sarah      | Land           |
| Carmen     | Toegel         |
| Dylan      | Wint           |
| Charles    | Bernick        |
| Michelle   | Torreliza      |
| Simrit     | Saraon         |
| Barnett    | Shpritz        |
| Karen L.   | Bell           |
| Ruth       | Tejeda         |
| Chrismary  | De La Cruz     |
| Lawrence   | Honig          |
| Betina     | Idnay          |
| Horacio A. | Capote         |
| Michelle   | Rainka         |
| Traci      | Aladeen        |
| Tatiana    | Jimenez-Knight |
| Heather    | MacNamara      |
| G. Peter   | Gliebus        |
| Katherine  | Rife           |
| Melinda    | Webster        |
| Christine  | Barr           |
| Monica     | Mazurek        |
| James J.   | Lah            |

|                |               |
|----------------|---------------|
| Allan I.       | Levey         |
| Deborah        | Westover      |
| Gail           | Schwartz      |
| Lauren         | Mariotti      |
| Raymond Scott  | Turner        |
| Melanie        | Chadwick      |
| Kathleen       | Johnson       |
| Brigid         | Reynolds      |
| Kelly          | McCann        |
| Jeffrey        | Ross          |
| Linda          | Rice          |
| Thomas O.      | Obisesan      |
| Oyonomo E.     | Ntekim        |
| Sheeba R.      | Nadarajah     |
| Sharlene       | Leong         |
| Jillian        | Turner        |
| Saba           | Wolday        |
| Mary           | Sano          |
| Judith         | Neugroschl    |
| Joanne         | Lim           |
| Allison        | Ardolino      |
| Gina           | Garcia Camilo |
| Amy            | Aloyisi       |
| Martin         | Farlow        |
| Jared          | Brosch        |
| Nancy          | McClaskey     |
| Paul B.        | Rosenberg     |
| Meghan         | Schultz       |
| Samantha       | Schwartz      |
| Samantha       | Horn          |
| Mersania       | Jn Pierre     |
| Neill R.       | Graff-Radford |
| Christopher    | Homa          |
| Amanda         | Phillips      |
| David S.       | Knopman       |
| Bronwyn        | Briseno       |
| Jonathan Graff | Radford       |
| Sara           | Mason         |
| Karen          | Kuntz         |

|              |                  |
|--------------|------------------|
| Kari         | Baxter           |
| Joseph C.    | Masdeu           |
| Belen        | Pascual          |
| Mica         | Mangibin         |
| Benjamin     | Batista          |
| Sandra       | Weintraub        |
| Ian          | Grant            |
| Brittanie    | Muse             |
| Shea         | Gold             |
| Jelena       | Pejic            |
| Loreece      | Haddad           |
| Melanie      | Shulman          |
| Anasztasia   | Ulysse           |
| Jamika       | Singleton-Garvin |
| Mohammed     | Sheikh           |
| Mrunaliniash | Gaikwad          |
| Aimee L.     | Pierce           |
| Lisa C.      | Silbert          |
| Steven       | Aurich           |
| Jeffrey A.   | Kaye             |
| Alexandra A. | Ruhf             |
| Amy B.       | Thomas           |
| Jeffrey N.   | Keller           |
| William P.   | Gahan            |
| Robert       | Brouillette      |
| Heather      | Foil             |
| Owen         | Carmichael       |
| Paul         | Winner           |
| Alfonso      | X Moreno         |
| Brian R.     | Ott (retired)    |
| Chuang-Kuo   | Wu               |
| Hannah       | Alaimo           |
| Lori A.      | Daiello          |
| Jonathan D.  | Drake            |
| Alisa        | Omert            |
| Jacobo       | Mintzer          |
| Olga         | Brawman-Mintzer  |
| Allison      | Acree            |
| Heather      | Allen            |

|              |               |
|--------------|---------------|
| Arthur       | Williams      |
| Neelum T.    | Aggarwal      |
| Ajay         | Sood          |
| Kimberly     | Blanchard     |
| Peter        | Lambiotis     |
| Amelia       | Troutman      |
| Elaine       | Peskind       |
| James        | O'Connell     |
| Adam         | McPartlin     |
| Murray A.    | Raskind       |
| Anita        | Ranta         |
| Jerome       | Yesavage      |
| Steven Z.    | Chao          |
| Tamara       | Beale         |
| Jaila        | Coleman       |
| Shawn        | Kile          |
| Valentina    | Mikhaleiko    |
| Yvonne       | Au            |
| Mary         | Vaughn        |
| Sampreet     | Moneski       |
| Tammy        | Donnell       |
| Dawn         | Lenakakis     |
| John Gregory | Duffy         |
| Lorrie       | Bisesi        |
| Poonam Nina  | Banerjee      |
| Maria        | Gonzalez      |
| Rania        | Bilwani       |
| Alan J.      | Lerner        |
| Maria        | Toth          |
| Parianne     | Fatica        |
| Susie        | Sami          |
| Paula        | Ogrocki       |
| Marianne     | Sanders       |
| Marissa C.   | Natelson Love |
| P. Denise    | Ledlow        |
| Amber        | Watkins       |
| David S.     | Geldmacher    |
| Loren        | Brown Ashley  |
| Jacqueline   | Vaughn        |

|             |               |
|-------------|---------------|
| John        | Olichney      |
| Charles     | DeCarli       |
| Hongzheng   | Zhang         |
| Antoinette  | Lopez         |
| Mary        | McPhail-Ciufo |
| Adrian      | Preda         |
| Andrea      | Weideman      |
| Steven      | Potkin        |
| Melanie     | Tallakson     |
| Catherine   | McAdams-Ortiz |
| Beatriz     | Vides         |
| Gaby        | T. Thai       |
| Steven      | P. Tam        |
| Maryam      | Beigi         |
| Thao        | Rodriguez     |
| Maya        | Farchi        |
| Roberto     | Hernandez     |
| Lorena      | Monseratt     |
| Lauren      | Garcia        |
| Celine      | Ossinalde     |
| Douglas     | Galasko       |
| Helen       | Vanderswag    |
| Laura       | Linares       |
| Chi         | Kim           |
| Shawnees    | Peacock       |
| Adam L.     | Boxer         |
| Lawren      | Vandevrede    |
| Peter       | Ljubenkov     |
| Julio C.    | Rojas         |
| Del D.      | Miller        |
| Hristina K. | Koleva        |
| Karen       | Ekstam Smith  |
| Laura       | Temple        |
| Susan       | Schultz       |
| Jeffrey M.  | Burns         |
| Anne        | Arthur        |
| Rachel      | Starr         |
| Nicole      | Mathis        |
| Phyllis     | Switzer       |

|            |               |
|------------|---------------|
| Gregory A. | Jicha         |
| Andrea     | L. Shaffer    |
| Sarah      | Hatch         |
| Sierra     | Fuhrmann      |
| Molly      | Harper        |
| Kelly      | Parsons       |
| Jaimie     | Ziolkowski    |
| Judith L.  | Heidebrink    |
| Bekkie     | Wang          |
| Daniel L.  | Murman        |
| Haley      | Kampschneider |
| Deb        | Heimes        |
| Nick       | Miller        |
| Jason      | Karlawish     |
| Sanjeev N. | Vaishnavi     |
| Martha     | Combs         |
| Jade       | Uffelman      |
| Loren      | Terrill       |
| Oscar      | Lopez         |
| Thomas     | Baumgartner   |
| Sarah      | Goldberg      |
| Donna      | Simpson       |
| Cary       | Zik           |
| Anton P.   | Porsteinsson  |
| Audrey     | Rice          |
| Susan      | Salem-Spencer |
| Bridget    | Holvey        |
| Asa        | Widman        |
| Mauricio   | Becerra       |
| Liberty    | Teodoro       |
| Sonia      | Pawluczyk     |
| Karen      | Dagerman      |
| Lon        | Schneider     |
| Brendan    | Kelley        |
| Shahera    | Ranjha        |
| Jana       | Windsor       |
| Mary       | Quiceno       |
| Cynthia M. | Carlsson      |
| Benjamin   | Farral        |

|               |                  |
|---------------|------------------|
| Kim           | Peterson         |
| Sandra        | Harding          |
| Aleshia       | Cole             |
| Amanda G.     | Smith            |
| Juris         | Jarvis           |
| Breanna       | Davis            |
| Kelly         | Rodrigo          |
| Ijeoma        | Mba              |
| Anna D.       | Sladky           |
| Patricia      | Lowe             |
| Suzanne       | Craft            |
| Abigail       | Heston O'Connell |
| Alexis        | Web              |
| Bevan         | Hoover           |
| Patricia      | Wittmer          |
| Randall       | Bateman          |
| Joy           | Snider           |
| Gregory       | Day              |
| Nupur         | Ghoshal          |
| Erik          | Musiek           |
| Tammie        | Benzinger        |
| John          | Morris           |
| Marta         | Santos           |
| Michael       | Lin              |
| Norman        | Relkin           |
| Ranjan        | Duara            |
| Maria T.      | Greig Custo      |
| Rosemarie A.  | Rodriguez        |
| Julieth       | Formosa          |
| Warren        | Barker           |
| Cesar         | Chirinos         |
| Joyce         | Lee              |
| Chrisopher H. | van Dyck         |
| Julia W.      | McDonald         |
| Susan         | P. Good          |
| Joanna        | E. Harris        |
| Kara          | Bates            |
| Jessica       | Lam              |



**Supplemental Table 1. Representativeness of Study Participants.**

|                                          |                                                                                                                                                                                                                                                                                                |
|------------------------------------------|------------------------------------------------------------------------------------------------------------------------------------------------------------------------------------------------------------------------------------------------------------------------------------------------|
| Disease                                  | Preclinical Alzheimer's disease                                                                                                                                                                                                                                                                |
| Sex and gender                           | AD is more common in women than men                                                                                                                                                                                                                                                            |
| Race or ethnic group                     | Increased risk and burden of dementia greater among African-American/Black and Hispanic/Latino individuals compared with non-Hispanic White individuals                                                                                                                                        |
| Age                                      | Prevalence increases steeply with age                                                                                                                                                                                                                                                          |
| Other considerations                     | Lower prevalence of amyloid accumulation in African-American/Black and Hispanic/Latino individuals confirmed during screening for A4. This finding is under investigation, but it may be an indication of increased risk of other dementia factors, such as vascular disease, in these groups. |
| Overall representativeness of this trial | The population studied in A4 is not representative of the population at risk for age-related cognitive decline or AD. Ongoing and future studies require major efforts to establish relationships of trust with diverse communities and minimize barriers to participation.                    |

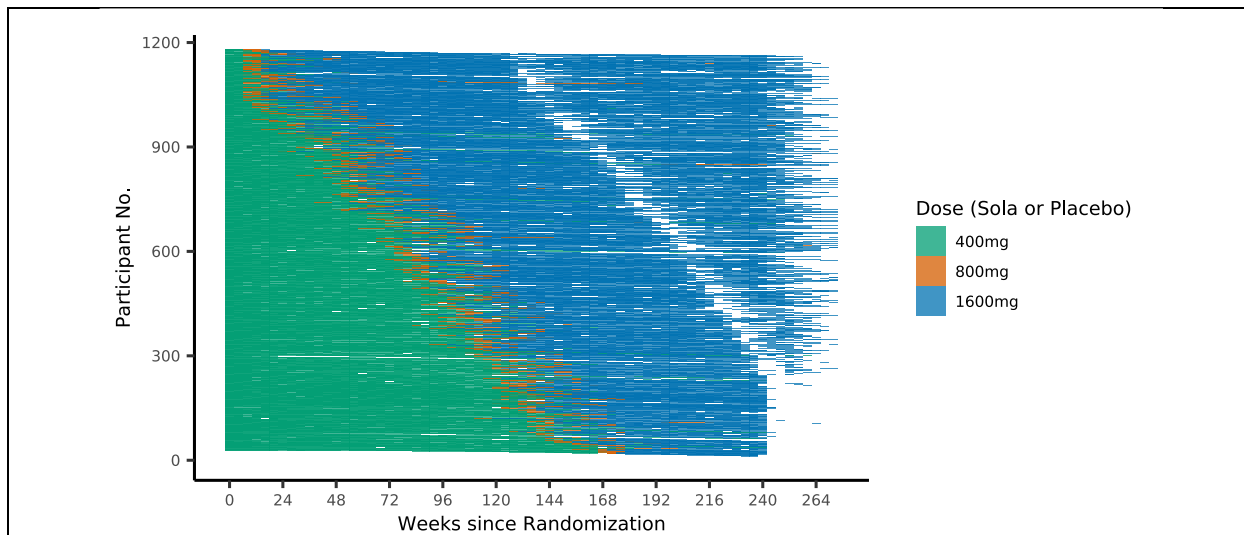

**Supplemental Figure 1. Administered doses of solanezumab or placebo per participant and weeks since randomization.** White spaces indicate missed doses or attrition. Participants who enrolled earlier and received fewer doses of 1600mg are depicted towards the bottom. Participants who enrolled later and received more doses of 1600mg are depicted towards the top. The hiatus in dosing due to the COVID19 pandemic is visible as the diagonal white band for all but the earliest enrolled participants.

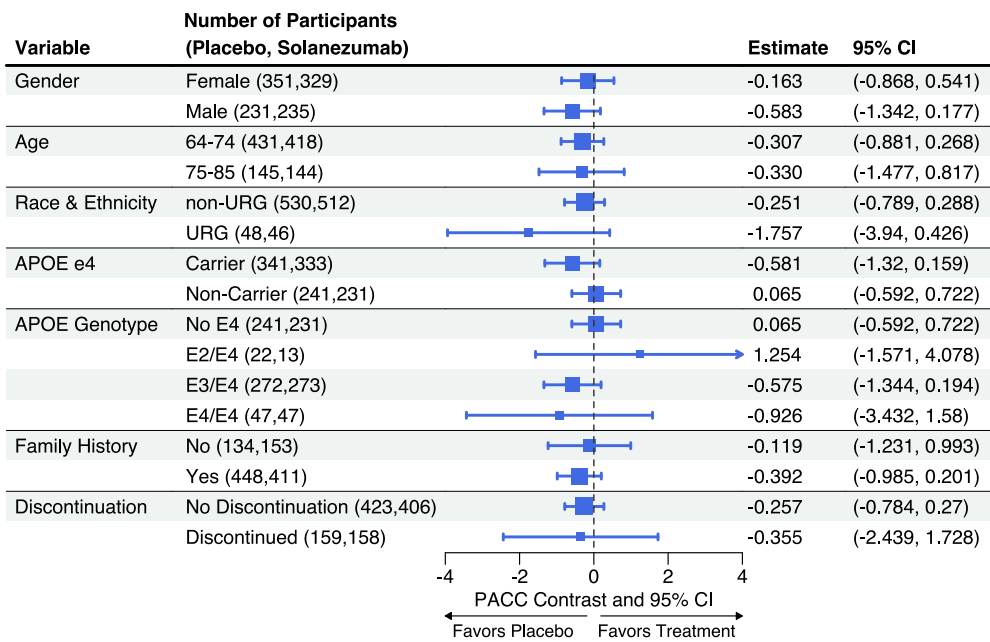

## Supplemental Figure 2. Subgroup Analyses of Primary Outcome

Forest plot of spline model adjusted randomized group difference in mean Preclinical Alzheimer Cognitive Composite (PACC) within the indicated subgroups. Confidence intervals (CI) which extend off of the plot are indicated with arrows. The natural cubic spline model includes effects for (i) two spline basis expansion terms for each subgroup, (ii) subgroup, (iii) PACC test version administered, (iv) age, (v) education, (vi) APOE4 Carrier Status (yes/no), and (vii) baseline florbetapir cortical SUVr. This model constrains the baseline treatment group means to be the same within each subgroup, but allow different baseline means for the subgroups. Redundant terms are dropped from the model in those cases in which the subgroup of interest is

overlapping with this general model (age and APOE subgroups). URG,  
Underrepresented Group.

**Supplemental Table 2: MMRM Analysis of Primary and Secondary Endpoints (Modified Intention-to-Treat Population).**

| Endpoint            |                                               | Solanezumab           | Placebo |
|---------------------|-----------------------------------------------|-----------------------|---------|
| <b>PACC</b>         | No. of participants evaluated*                | 401                   | 423     |
|                     | Adjusted mean change                          | -1.68                 | -1.34   |
|                     | Adjusted mean difference vs. placebo (95% CI) | -0.34 (-0.94 to 0.27) |         |
| <b>CFI Combined</b> | No. of participants evaluated*                | 403                   | 416     |
|                     | Adjusted mean change                          | 1.84                  | 1.30    |
|                     | Adjusted mean difference vs. placebo (95% CI) | 0.54 (-0.07 to 1.15)  |         |
| <b>ADL Partner</b>  | No. of participants evaluated*                | 403                   | 419     |
|                     | Adjusted mean change                          | -2.59                 | -1.87   |
|                     | Adjusted mean difference vs. placebo (95% CI) | -0.72 (-1.49 to 0.05) |         |
| <b>CDR-SB</b>       | No. of participants evaluated*                | 405                   | 421     |
|                     | Adjusted mean change                          | 0.86                  | 0.66    |
|                     | Adjusted mean difference vs. placebo (95% CI) | 0.20 ( 0.01 to 0.40)  |         |

Adjusted mean and nominal 95% confidence intervals (CI) for the final visit derived from Mixed Model Repeated Measures (MMRM) analysis of Preclinical Alzheimer's Cognitive Composite (PACC), Cognitive Function Index (CFI) Participant and Partner, ADCS-Activities of Daily Living (ADL) Prevention Questionnaire Partner, and Clinical Dementia Rating - Sum of Boxes (CDR-SB).

**Supplemental Table 3. Imaging Biomarker Endpoints.**

| Endpoint                         |                                               | Solanezumab              | Placebo |
|----------------------------------|-----------------------------------------------|--------------------------|---------|
| <b>FBP Composite</b>             | No. of participants evaluated*                | 462                      | 477     |
|                                  | Adjusted mean change                          | 11.6                     | 19.3    |
|                                  | Adjusted mean difference vs. placebo (95% CI) | -7.7 (-10 to -5.1)       |         |
| <b>FTP MTL Composite</b>         | No. of participants evaluated*                | 172                      | 168     |
|                                  | Adjusted mean change                          | 0.0547                   | 0.0665  |
|                                  | Adjusted mean difference vs. placebo (95% CI) | -0.012 (-0.03 to 0.006)  |         |
| <b>FTP Neocortical Composite</b> | No. of participants evaluated*                | 172                      | 168     |
|                                  | Adjusted mean change                          | 0.0720                   | 0.0858  |
|                                  | Adjusted mean difference vs. placebo (95% CI) | -0.014 (-0.04 to 0.012)  |         |
| <b>MRI Cortical Gray Matter</b>  | No. of participants evaluated*                | 394                      | 408     |
|                                  | Adjusted mean change                          | -15.3                    | -14.1   |
|                                  | Adjusted mean difference vs. placebo (95% CI) | -1.2 (-2.5 to 0.19)      |         |
| <b>MRI Hippocampal Volume</b>    | No. of participants evaluated*                | 394                      | 408     |
|                                  | Adjusted mean change                          | -0.505                   | -0.492  |
|                                  | Adjusted mean difference vs. placebo (95% CI) | -0.013 (-0.054 to 0.027) |         |

The table provides model adjusted mean change and nominal 95% confidence intervals (CI) estimated from analysis of covariance models with age, APOE, treatment group, and baseline biomarker value as covariates. The 95% confidence intervals are not adjusted for multiple comparisons. Endpoints include florbetapir (FBP) amyloid positron emission tomography (PET) composite in centiloids, flortaucipir (FTP) tau PET medial temporal lobe (MTL) composite of amygdala, entorhinal, and parahippocampal standardized uptake value ratios (SUVr), FTP tau PET neocortical composite of fusiform, inferior temporal, middle temporal, inferior parietal SUVr, and magnetic resonance imaging (MRI) of hippocampal and total gray matter volume in cubic centimeters (cc).

\*Some participants had delayed evaluations beyond 240 weeks due to the COVID pandemic.

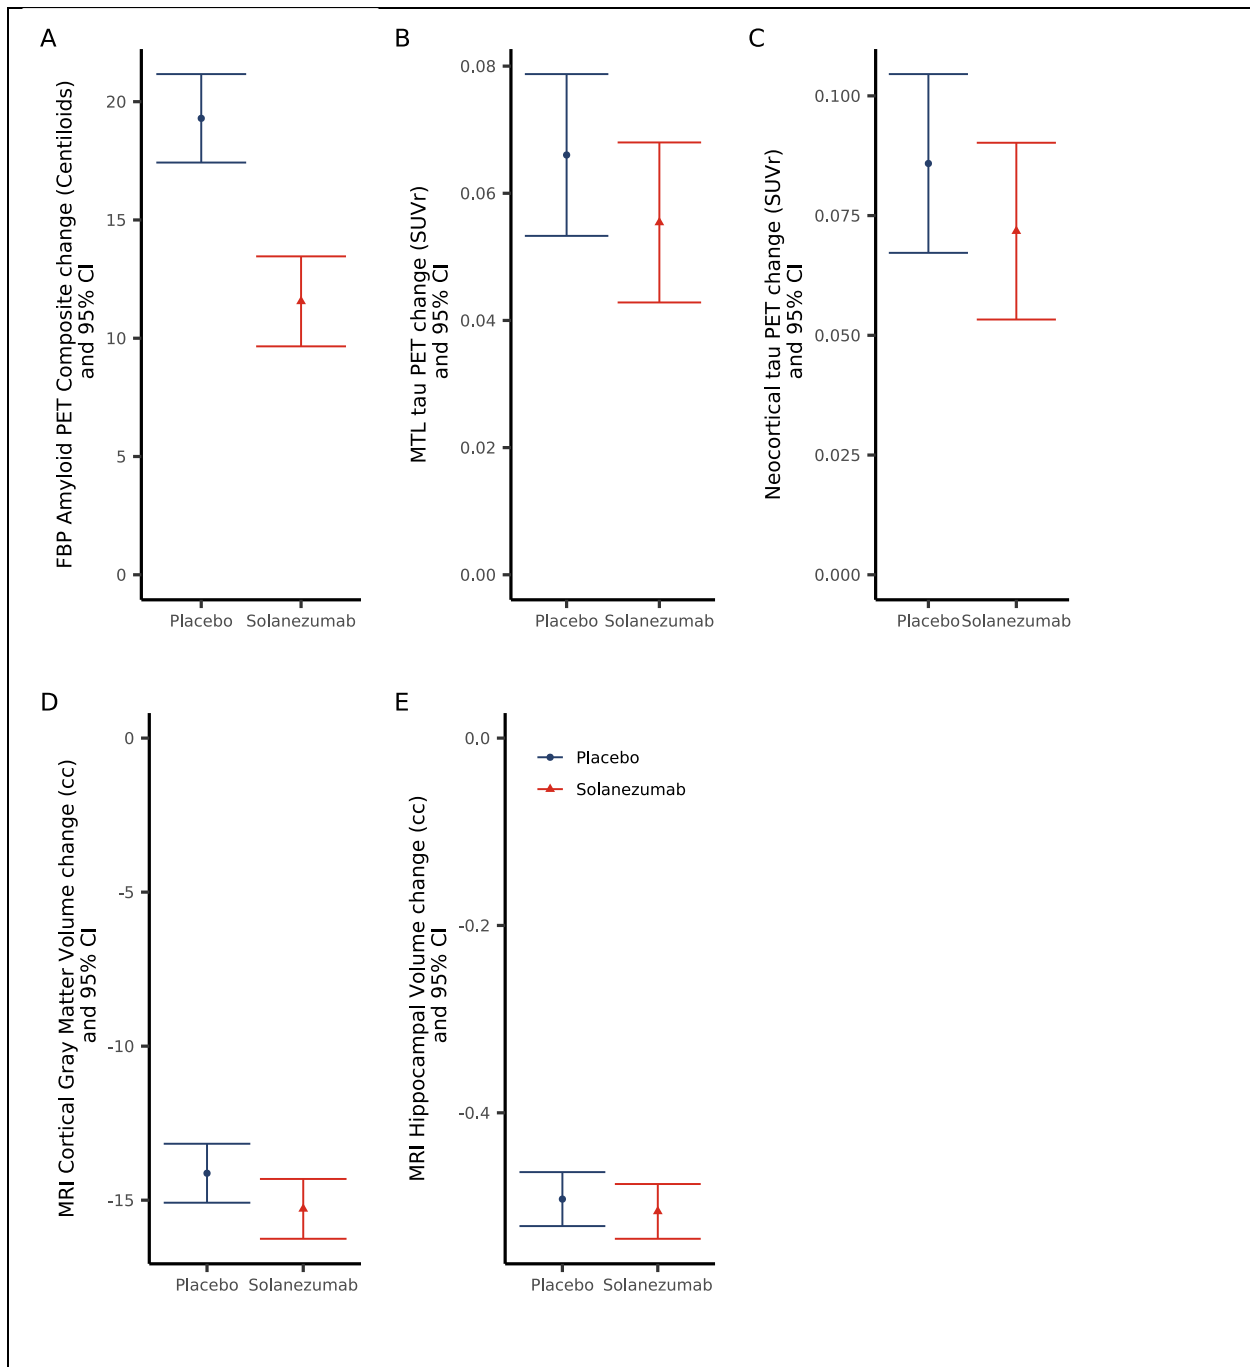

**Supplemental Figure 3. Imaging Biomarker Endpoints.** All panels show model adjusted mean change and nominal 95% confidence intervals (CI) estimated from analysis of covariance models with age, APOE, treatment group, and baseline biomarker value as covariates. The 95% confidence intervals are not adjusted for multiple testing. Panel A shows florbetapir (FBP) amyloid positron emission tomography (PET) composite in centiloids. Panel B shows flortaucipir tau PET medial temporal lobe (MTL) composite of amygdala, entorhinal, and parahippocampal standardized uptake value ratios (SUVr). Panel C shows FTP tau PET neocortical composite of fusiform, inferior temporal, middle temporal, inferior parietal SUVr.

Panels D and E show magnetic resonance imaging (MRI) of total gray matter volume and hippocampal volume in cubic centimeters (cc).





**Supplemental Figure 4. Cognitive and functional scores by level of baseline amyloid.**

All panels show results for the modified intention-to-treat population. The shaded regions represent nominal 95% confidence intervals that are not adjusted for multiple testing. Data are aggregated with respect to treatment groups and grouped instead by tertiles of baseline florbetapir amyloid positron emission tomography (PET). The Panel A shows the primary end point, the Preclinical Alzheimer Cognitive Composite (PACC). The PACC is the sum of four z-scores with higher scores indicating better cognitive performance. The adjusted means and 95% confidence (indicated by shaded regions) were estimated using a natural cubic spline model. The model allows amyloid group baseline means to be different and includes (i) two spline basis expansion terms for each amyloid group (six terms total), (ii) PACC test version administered, (iii) age, (iv) education, (v) APOE4 Carrier Status (yes/no), and (vi) baseline florbetapir cortical SUVR. Panels B and C show spline model adjusted mean Cognitive Function Index (CFI) Participant and Partner, ADCS-Activities of Daily Living (ADL) Prevention Questionnaire Partner. Panel D shows spline model adjusted mean Clinical Dementia Rating - Sum of Boxes (CDR-SB). Panel E shows Kaplan-Meier estimates of Global Score (CDR-GS) Progression stratified by amyloid group.

**Supplemental Table 4. Adverse events.**

|                                                   | <b>Solanezumab</b> | <b>Placebo</b>   |
|---------------------------------------------------|--------------------|------------------|
|                                                   | <b>(N = 572)</b>   | <b>(N = 591)</b> |
| <b>Events of special interest</b>                 |                    |                  |
| Any Treatment Emergent adverse event (TEAE)       | 560 (97.9)         | 577 (97.6)       |
| TEAE definitely related to Solanezumab or Placebo | 6 (1.0)            | 8 (1.4)          |
| Treatment Emergent Serious Adverse event (TESAE)  | 172 (30.1)         | 158 (26.7)       |
| Death                                             | 6 (1.0)            | 7 (1.2)          |
| TEAE leading to discontinuation                   | 28 (4.9)           | 34 (5.8)         |
| ARIA, n (%)                                       | 167 (29.2%)        | 194 (32.8%)      |
| ARIA-E, n (%)                                     | 1 (0.2%)           | 2 (0.3%)         |
| ARIA-H, n (%)                                     | 167 (29.2%)        | 194 (32.8%)      |
| Microhemorrhage, n (%)                            | 158 (27.6%)        | 189 (32.0%)      |
| Superficial siderosis, n (%)                      | 19 (3.3%)          | 19 (3.2%)        |

**Adverse event that occurred in  
≥5% of participants in either  
group**

|                                   |            |            |
|-----------------------------------|------------|------------|
| Upper respiratory tract infection | 174 (30.4) | 198 (33.5) |
| Fall                              | 172 (30.1) | 160 (27.1) |
| Nasopharyngitis                   | 117 (20.5) | 121 (20.5) |
| Arthralgia                        | 116 (20.3) | 119 (20.1) |
| Headache                          | 113 (19.8) | 118 (20.0) |
| Urinary tract infection           | 83 (14.5)  | 94 (15.9)  |
| Dizziness                         | 80 (14.0)  | 62 (10.5)  |
| Diarrhoea                         | 78 (13.6)  | 78 (13.2)  |
| Back pain                         | 78 (13.6)  | 78 (13.2)  |
| Cataract                          | 61 (10.7)  | 75 (12.7)  |
| Sinusitis                         | 59 (10.3)  | 74 (12.5)  |
| Contusion                         | 59 (10.3)  | 56 ( 9.5)  |
| Hypertension                      | 58 (10.1)  | 60 (10.2)  |
| Fatigue                           | 56 ( 9.8)  | 46 ( 7.8)  |
| Rash                              | 56 ( 9.8)  | 39 ( 6.6)  |
| Osteoarthritis                    | 55 ( 9.6)  | 63 (10.7)  |
| Cognitive disorder                | 51 ( 8.9)  | 34 ( 5.8)  |
| Bronchitis                        | 50 ( 8.7)  | 63 (10.7)  |

|                                  |           |           |
|----------------------------------|-----------|-----------|
| Influenza                        | 49 ( 8.6) | 43 ( 7.3) |
| Pain in extremity                | 47 ( 8.2) | 53 ( 9.0) |
| Basal cell carcinoma             | 47 ( 8.2) | 53 ( 9.0) |
| Skin laceration                  | 43 ( 7.5) | 53 ( 9.0) |
| Muscle strain                    | 43 ( 7.5) | 37 ( 6.3) |
| Cough                            | 43 ( 7.5) | 50 ( 8.5) |
| Muscle spasms                    | 40 ( 7.0) | 33 ( 5.6) |
| Anxiety                          | 38 ( 6.6) | 34 ( 5.8) |
| Vertigo                          | 35 ( 6.1) | 29 ( 4.9) |
| Depression                       | 35 ( 6.1) | 38 ( 6.4) |
| Skin abrasion                    | 34 ( 5.9) | 28 ( 4.7) |
| Arthritis                        | 34 ( 5.9) | 37 ( 6.3) |
| Insomnia                         | 34 ( 5.9) | 36 ( 6.1) |
| Gastrooesophageal reflux disease | 33 ( 5.8) | 38 ( 6.4) |
| Nausea                           | 33 ( 5.8) | 31 ( 5.2) |
| Squamous cell carcinoma          | 33 ( 5.8) | 30 ( 5.1) |
| Sciatica                         | 33 ( 5.8) | 22 ( 3.7) |
| Ligament sprain                  | 31 ( 5.4) | 40 ( 6.8) |
| Seasonal allergy                 | 30 ( 5.2) | 24 ( 4.1) |
| Cellulitis                       | 29 ( 5.1) | 30 ( 5.1) |

|                                         |           |           |
|-----------------------------------------|-----------|-----------|
| Myalgia                                 | 29 ( 5.1) | 23 ( 3.9) |
| Dermatitis contact                      | 29 ( 5.1) | 26 ( 4.4) |
| Viral upper respiratory tract infection | 27 ( 4.7) | 39 ( 6.6) |
| Atrial fibrillation                     | 26 ( 4.5) | 31 ( 5.2) |
| Pneumonia                               | 26 ( 4.5) | 33 ( 5.6) |
| Cerebral microhaemorrhage               | 22 ( 3.8) | 41 ( 6.9) |
| Arthropod bite                          | 21 ( 3.7) | 30 ( 5.1) |
